# Supplementary material
Source: publisher figshare collection journal article supplement (https://acs.figshare.com/ndownloader/files/3880882)
Supplement: Supplementary file 1 [file 3880882]

## **Phase transfer of noble metal nanoparticles from ionic liquids to an organic/aqueous medium**

Penglei Cui,<sup>†</sup> Hongyan He,<sup>†</sup> Dong Chen,<sup>†,‡</sup> Hui Liu,<sup>†,‡</sup> Suojia Zhang,<sup>\*,†</sup> Jun Yang<sup>\*,†</sup>

<sup>†</sup>State Key Laboratory of Multiphase Complex Systems, Institute of Process Engineering, Chinese Academy of Sciences, Beijing, China 100190. Fax: 86-10-8254 4915; Tel: 86-10-8254 4915; E-mail: [szhang@ipe.ac.cn](mailto:szhang@ipe.ac.cn) (SZ); [jyang@ipe.ac.cn](mailto:jyang@ipe.ac.cn) (JY)

<sup>‡</sup>University of Chinese Academy of Sciences, No. 19A Yuquan Road, Beijing, China 100049.

Financial support from the 100 Talents Program of the Chinese Academy of Sciences, National Natural Science Foundation of China (No.: 21173226, 21376247), and State Key Laboratory of Multiphase Complex Systems, Institute of Process Engineering, Chinese Academy of Sciences (MPCS-2012-A-11) is gratefully acknowledged.

**Table S1.** Size, and size distribution of noble metal nanoparticles (NMNPs) transferred from IL/water with different volume ratios into toluene.

| NMNPs | IL/water volume ratios | $\bar{d}$ (nm) | $\sigma$ (nm) | $\bar{\sigma}$ (%) |
|-------|------------------------|----------------|---------------|--------------------|
| Pt    | 0/100                  | 4.6            | 3.1           | 67.4               |
|       | 20/80                  | 4.4            | 2.8           | 63.6               |
|       | 40/60                  | 3.2            | 1.4           | 43.7               |
|       | 60/40                  | 2.6            | 0.61          | 23.4               |
|       | 80/20                  | 1.7            | 0.24          | 14.1               |
|       | 100/0                  | 1.2            | 0.11          | 9.17               |
| Pd    | 0/100                  | /              | /             | /                  |
|       | 20/80                  | 8.2            | 2.9           | 35.4               |
|       | 40/60                  | 7.6            | 2.5           | 32.9               |
|       | 60/40                  | 5.6            | 1.3           | 23.2               |
|       | 80/20                  | 4.2            | 0.94          | 22.4               |
|       | 100/0                  | 2.8            | 0.41          | 14.6               |
| Au    | 0/100                  | 7.2            | 1.1           | 15.3               |
|       | 100/0                  | 5.9            | 0.82          | 13.9               |

$$\bar{d} = \frac{\sum_{i=1}^N x_i}{N}, \quad \sigma = \sqrt{\frac{\sum_{i=1}^N (x_i - \mu)^2}{N}}, \quad \bar{\sigma} = \frac{\sigma}{\bar{d}}$$

where  $\bar{d}$  = mean particle size,  $x$  = the size of one particle,  $N$  = the total number of the particles counted,  $\sigma$  = standard deviation,  $\bar{\sigma}$  = relative standard deviation.

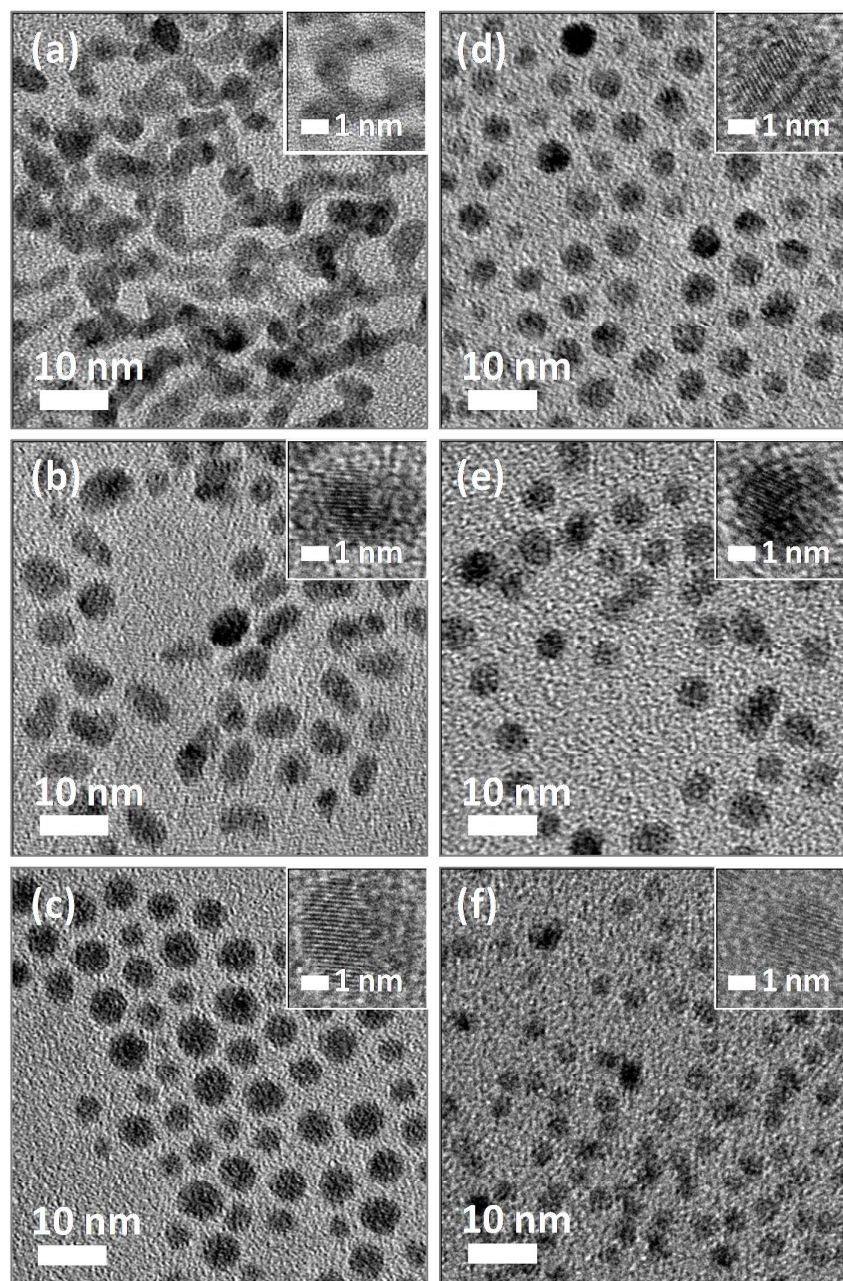

**Figure S1.** TEM images and corresponding HRTEM images (inserts in each TEM image) of Pd nanoparticles transferred from IL/water with volume ratios of 0/100 (a), 20/80 (b), 40/60 (c), 60/40 (d), 80/20 (e), and 100/0 (f), respectively.

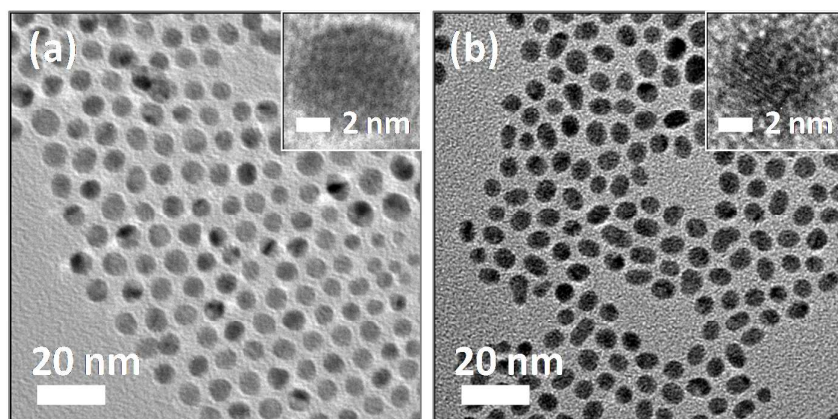

**Figure S2.** TEM images and corresponding HRTEM images (inserts in each TEM image) of Au nanoparticles transferred from IL/water with volume ratios of 0/100 (a) and 100/0 (b), respectively.

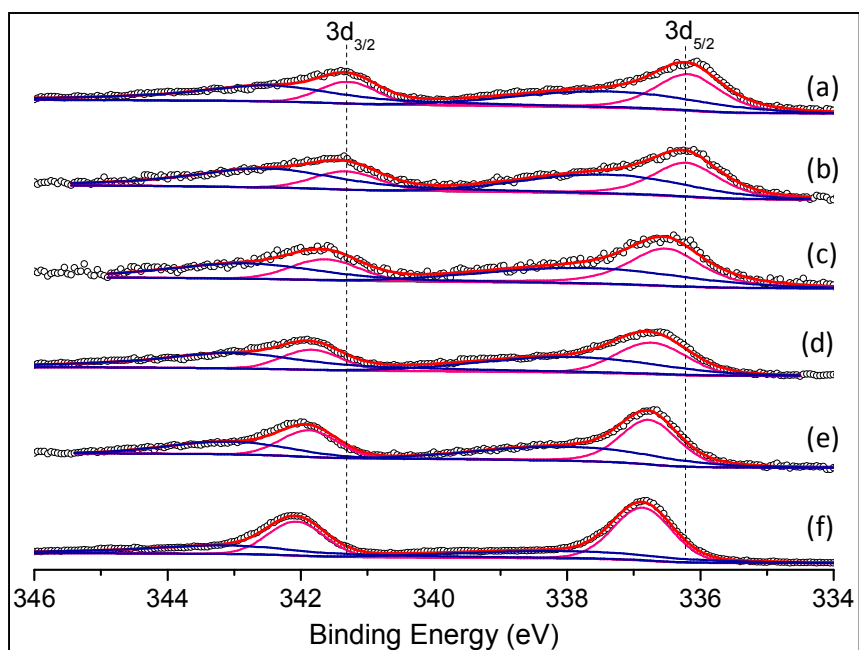

**Figure S3.** 4f XPS spectra of Pd nanoparticles transferred from IL/water with volume ratios of 0/100 (a), 20/80 (b), 40/60 (c), 60/40 (d), 80/20 (e), and 100/0 (f), respectively.

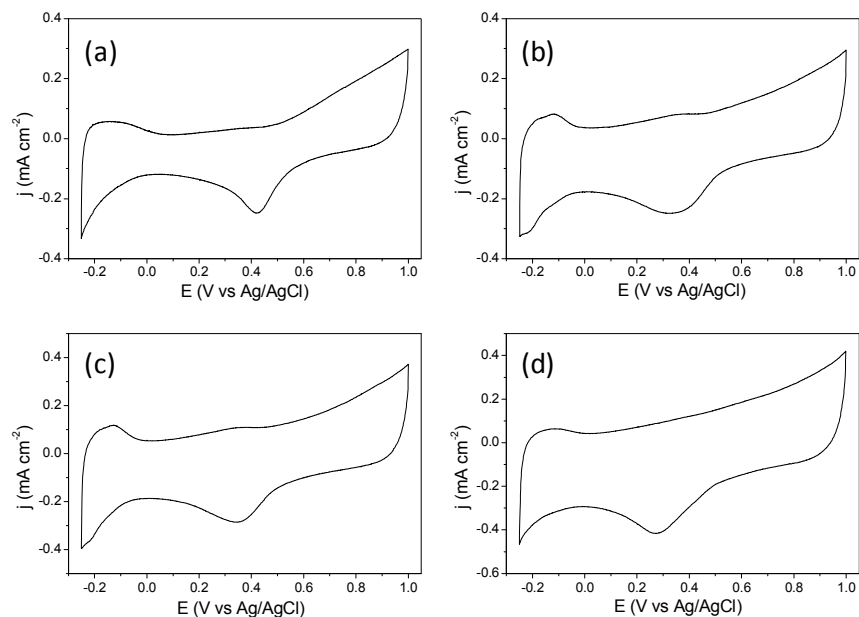

**Figure S4.** Cyclic voltammograms of Pt nanoparticles transferred from IL/water mixtures with volume ratios of 0/100 (a), 20/80 (b), 60/40 (c), and 100/0 (d), respectively, in argon-purged HClO<sub>4</sub> (0.1 M) at 50 mV/s. The electrolyte is methanol (1 M) in perchloric acid (0.1 M).

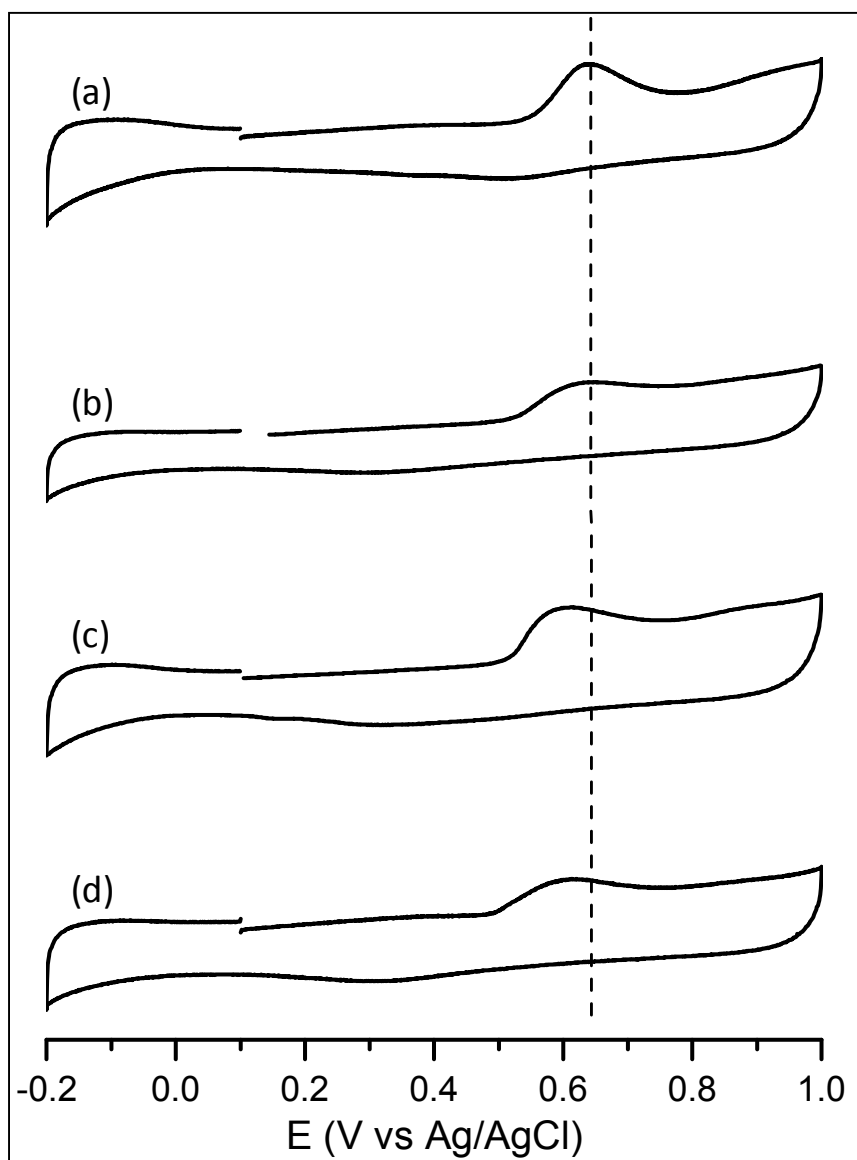

**Figure S5.** Room-temperature CO stripping from the Pt nanoparticles transferred from IL/water mixtures with volume ratios of 0/100 (a), 20/80 (b), 60/40 (c), and 100/0 (d), respectively, in  $\text{HClO}_4$  (0.1 M).
